# Supplementary material
Source: publisher site journal article supplement (https://www.spandidos-publications.com/940/downloadSupplementary)
Supplement: Supplementary file 1 [file downloadSupplementary]

## Sheet: Sheet1
Table SII. Clinical samples information.
Number	Sex	Age	Pathological staging
1	Male	55	pT3aN1M1
2	Male	88	pT1bN0M0
3	Female	66	pT1bN0M0
4	Male	68	pT1aN0M0
5	Male	64	pT1bN0M0
6	Female	48	pT1bN0M0
7	Male	57	pT1aN0M0
8	Male	64	pT1bN0M0
